# Supplementary material for: Hexokinase 2 aggravates airway inflammation in experimental asthma by regulating airway epithelial cell death
Source: Research Square preprint supplement (doi:10.21203/rs.3.rs-3874780/v1), 2024-02-07
Supplement: Supplementary file 1 [file 7f7250cee7e5332d03d1b2bd.docx]

**Additional file1.** Supplemental Table 1 Mouse primers of genes.

| mouse IL-6 forward | CTGCAAGAGACTTCCATCCAG |
| --- | --- |
| mouse IL-6 reverse | AGTGGTATAGACAGGTCTGTTGG |
| mouse KC forward | TGCGAAAAGAAGTGCAGAGA |
| mouse KC reverse | TACAAACACAGCCTCCCACA |
| mouse Il10 forward | GCTGGACAACATACTGCTAACC |
| mouse Il10 reverse | CCCAAGTAACCCTTAAAGTCCTG |
| mouse CCL20 forward | AAGACAGATGGCCGATGAAG |
| mouse CCL20 reverse | AGCCCTTTTCACCCAGTTCT |
| mouse IL4 forward | GGCATTTTGAACGAGGTCAC |
| mouse IL4 reverse | AAATATGCGAAGCACCTTGG |
| mouse IL13 forward | GCAACATCACACAAGACCAGA |
| Mouse IL13 reverse | GTCAGGGAATCCAGGGCTAC |
| mouse CCL11 forward | GAATCACCAACAACAGATGCAC |
| Mouse CCL11 reverse | ATCCTGGACCCACTTCTTCTT |
| mouse CCL24 forward | AGGCAGTGAGAACCAAGT |
| mouse CCL24 forward | GCGTCAATACCTATGTCCAA |
| M-IL-33-F | TGCTGCGTCTGTTGACACATTGAG |
| M-IL-33-R | CATCCACACCGTCGCCTGATTG |
| mouse β-Act forward | GGCTGTATTCCCCTCCATCG |
| mouse β-Act reverse | CCAGTTGGTAACAAATGCCATGT |
| human IL-6 forward | TGAAAGCAGCAAAGAGGCACT |
| human IL-6 reverse | GCAAGTCTCCTCATTGAATCCAG |
| human IL-8 forward | CGCCTTTACAATAATTTCTGTGTTGGCG |
| human IL-8 reverse | CTTGGCAGCCTTCCTGA TTTCT |
| human CCL20 forward | CGAATCAGAAGCAGCAAGCAA |
| human CCL20 reverse | TTGCGCACACAGACAACTTT |
| human 18s forward | GTAACCCGTTGAACCCCATT |
| human 18s reverse | CCATCCAATCGGTAGTAGCG |
